# Supplementary material for: Optical spectra and conformation pool of tyrosine kinase inhibitor PD153035 using a robust quantum mechanical conformation search
Source: Royal Society of Chemistry journal article supplement (doi:10.1039/d1nj04348j), 2022-01-01
Supplement: d1nj04348j1.pdf [file d1nj04348j1.pdf]

## Optical spectra and conformation pool of tyrosine kinase inhibitor PD153035 using robust quantum mechanical conformation search

Feng Wang<sup>1\*</sup>, Vladislav Vasilyev<sup>2</sup> and Andrew H. A. Clayton<sup>3</sup>

<sup>1</sup>*Department of Chemistry and Biotechnology, School of Science, Computing and Engineering Technologies, Swinburne University of Technology, Melbourne, Victoria 3122, Australia*

<sup>2</sup>*National Computational Infrastructure, Australian National University, Canberra, ACT 0200, Australia*

<sup>3</sup>*Optical Sciences Centre, School of Science, Computing and Engineering Technologies, Swinburne University of Technology, Melbourne, Victoria, 3122, Australia*

### Supplementary Materials

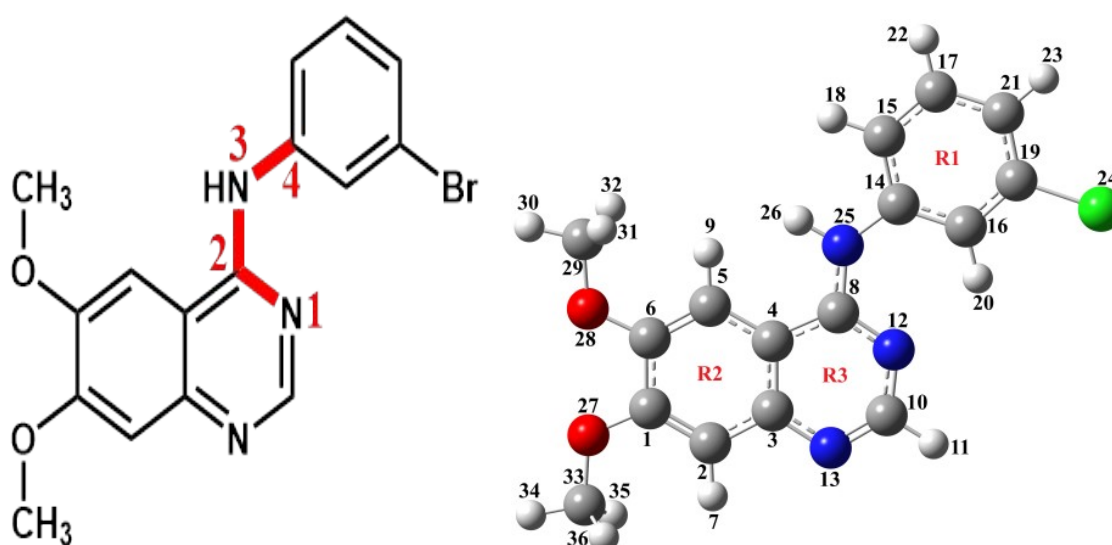

Fig. S1. Chemical structure of PD153035 (IUPAC name: 4-(3-bromoanilino)-6,7-dimethoxyquinazoline). Synonyms: AG1517, SU-5271, ZM-252868, K11-900B, and NSC 669364. The atomic labels on the structure on the right is not the IUPAC nomenclature but numbering form the Gaussian calculations for convenience. The halogen atom (Br) is atom 24.

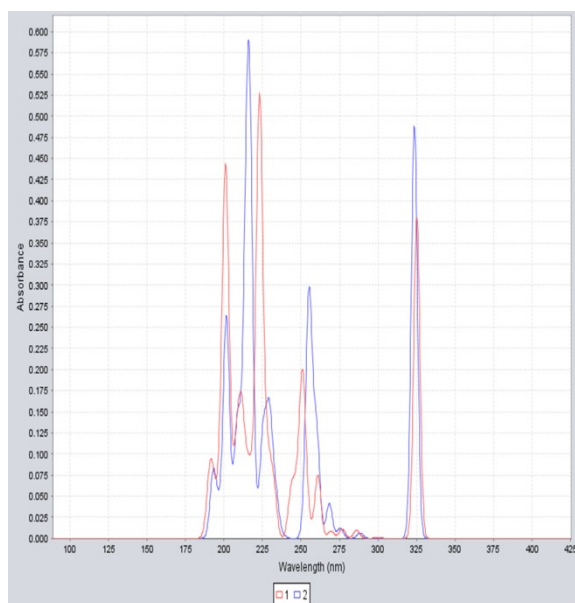

**(a) Spectra in 180-330 nm.**

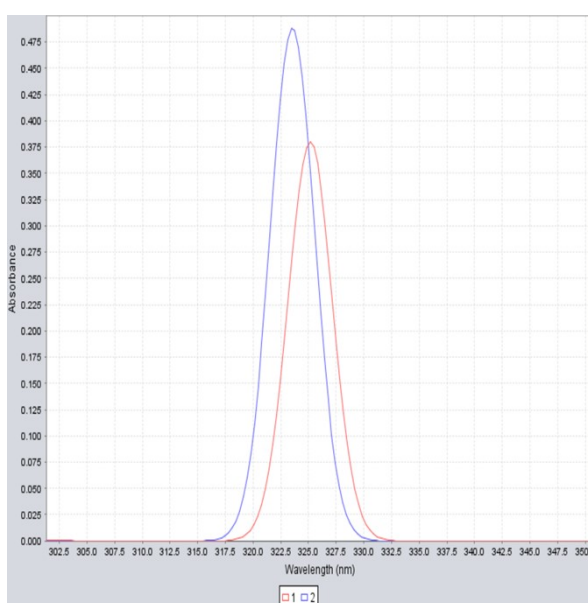

**(b) Spectra above 300 nm.**

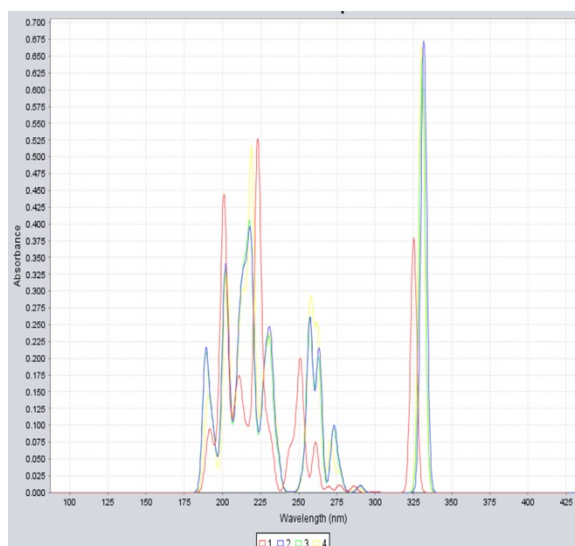

**(c) Spectra in solvent in 180-330 nm.**

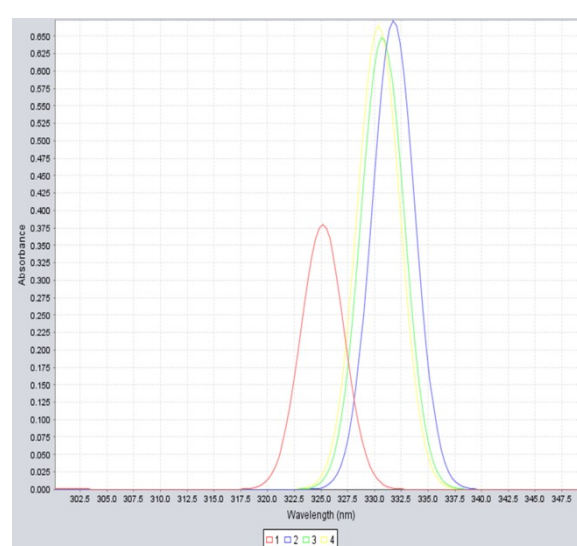

**(d) Spectra in solvent above 300 nm.**

Fig. S2 UV-vis spectra of PD153035 were calculated for the conformer from the EGFR Database (spectrum 1, red) and the global minimum structure in gas phase (spectrum 2, blue) in (a) and (b)) using the TD-DFT method. The same UV-vis spectra in (c) and (d) for the conformer from the EGFR database (1 red) and the global minimum structures in DMSO (2 blue), MeOH (3 green), TOL (4 yellow) solvent, respectively.

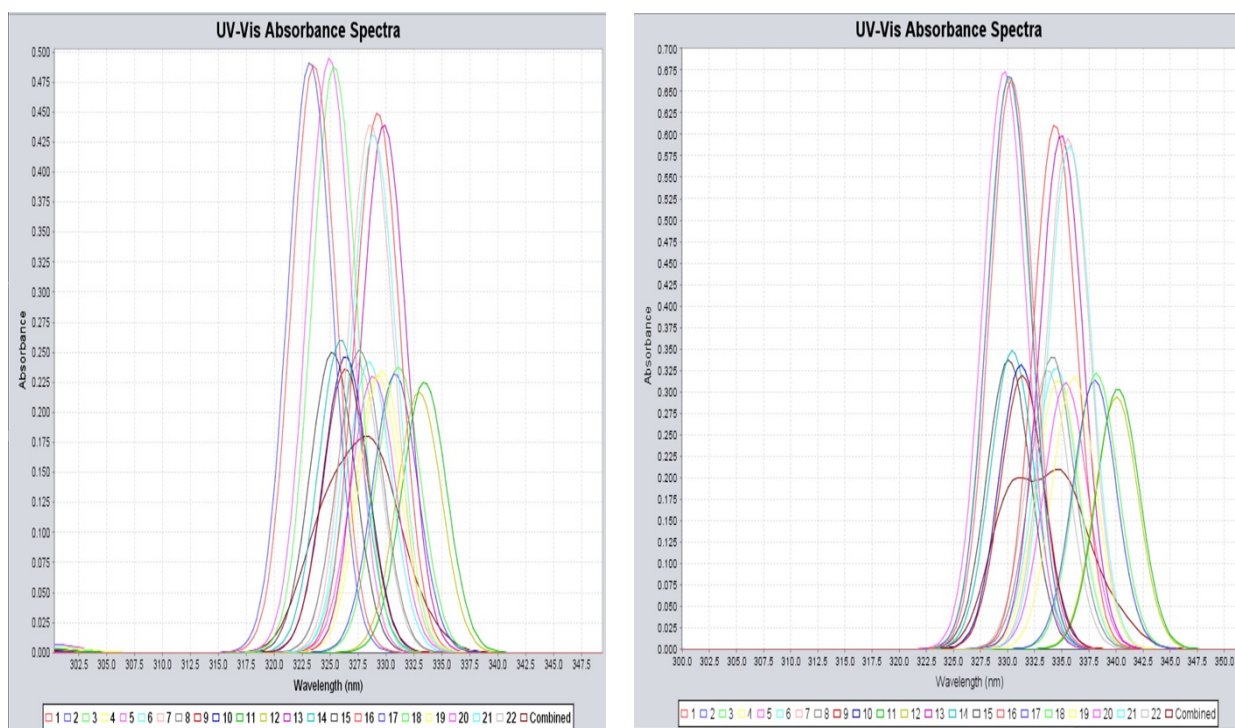

Fig. S3 UV-vis spectra of all 22 low-lying cluster conformers of PD153035 calculated using DFT B3LYP/6-311++G(d,p) in gas phase (x-axis nm) (left) and in Toluene (right).

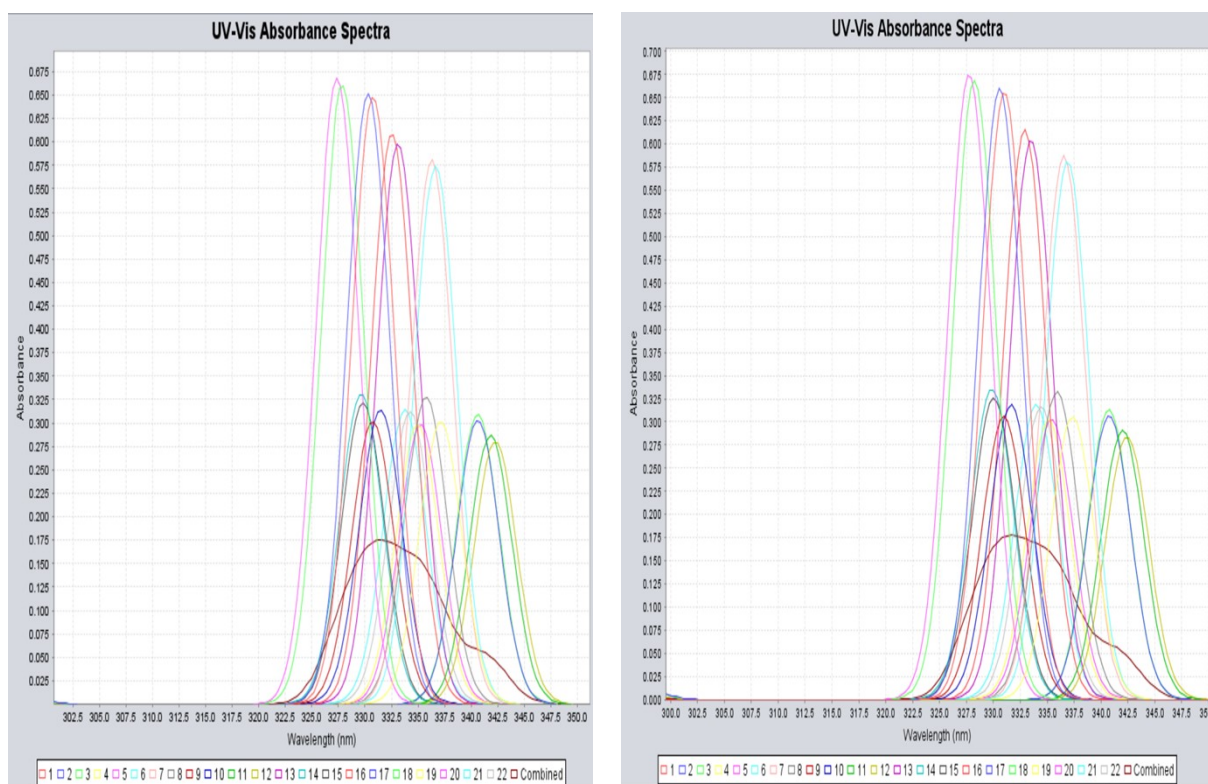

Fig. S4 UV-vis spectra of all 22 low-lying cluster conformers of PD153035 calculated using DFT B3LYP/6-311++G(d,p) in MeOH (x-axis nm) (left) and in EtOH (right).

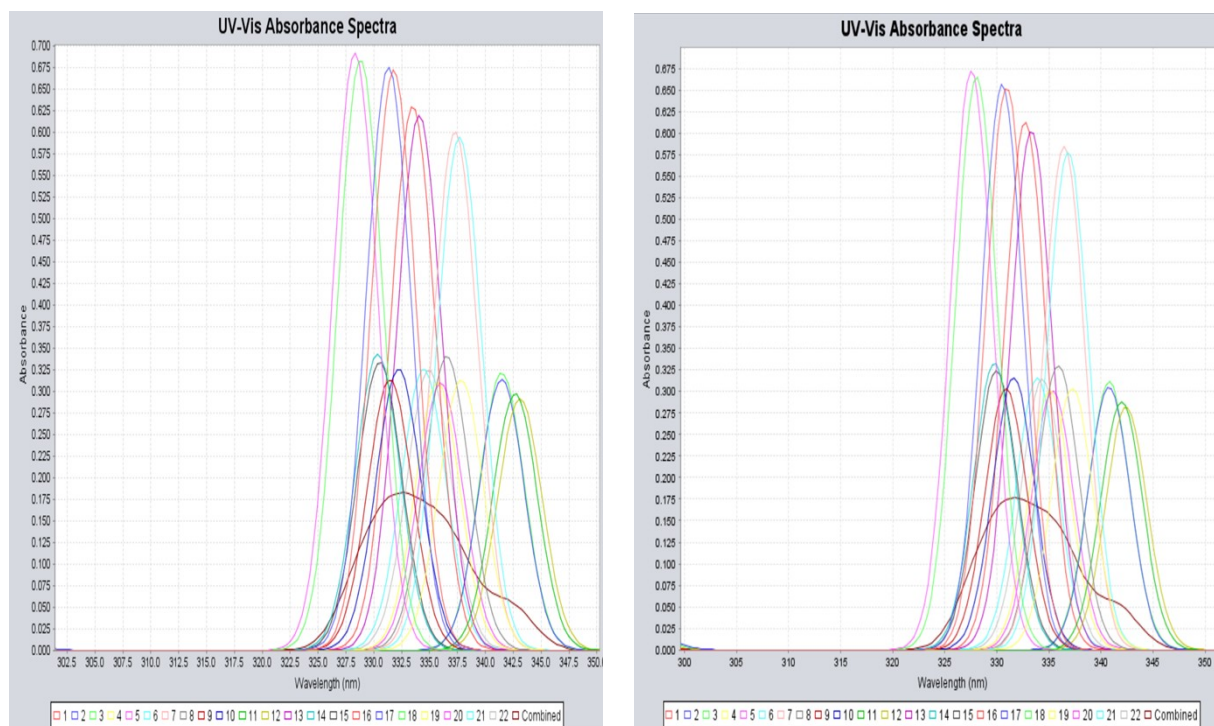

Fig. S5 UV-vis spectra of all 22 low-lying cluster conformers of PD153035 calculated using DFT B3LYP/6-311++G(d,p) in ACN (x-axis nm) (left) and in DMSO (right).

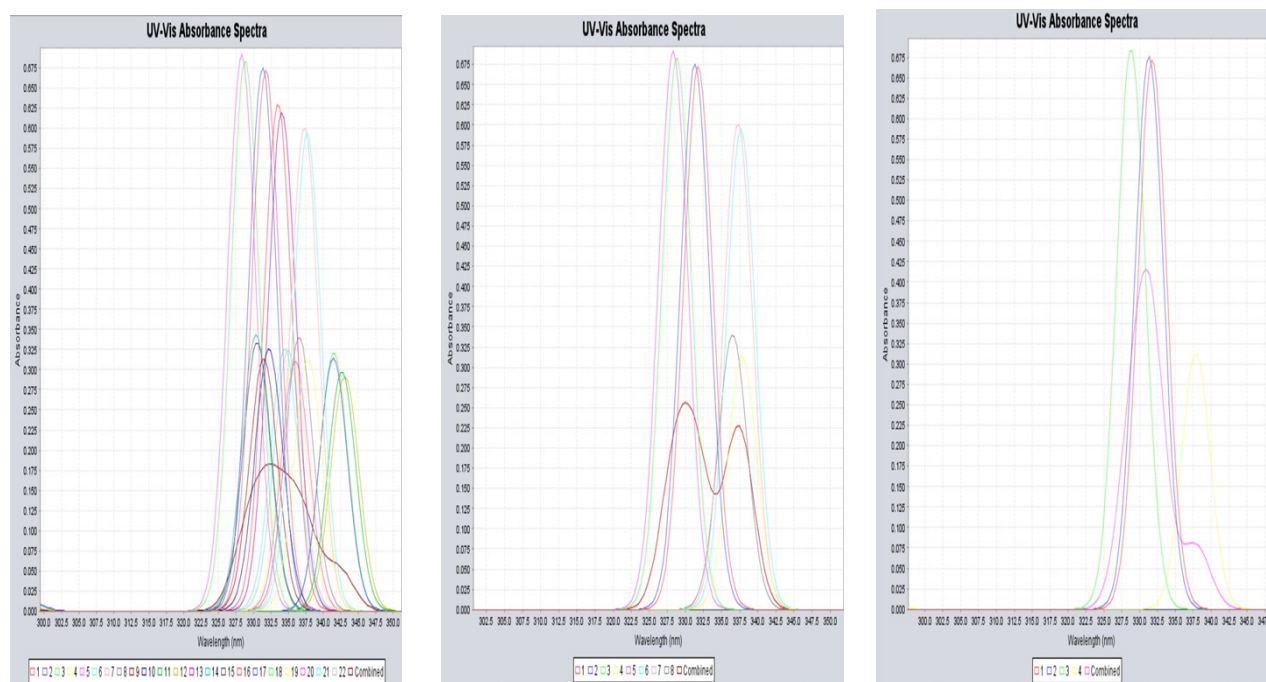

(a) All 22 clusters of conformers

(b) Lowest 8 clusters of conformers

(c) Lowest 4 conformers

Fig. S6 UV-vis spectra of low-lying cluster conformers of PD153035 calculated using DFT B3LYP/6-311++G(d,p) in DMSO solvent (x-axis nm). (a) All 22 conformers with strain energy upto 10.459 kcal/mol, the eight low-lying conformers with strain energy cut-off at the strain energy of the crystal structure of 5.554 kcal/mol, and (c) the four low-lying conformers.

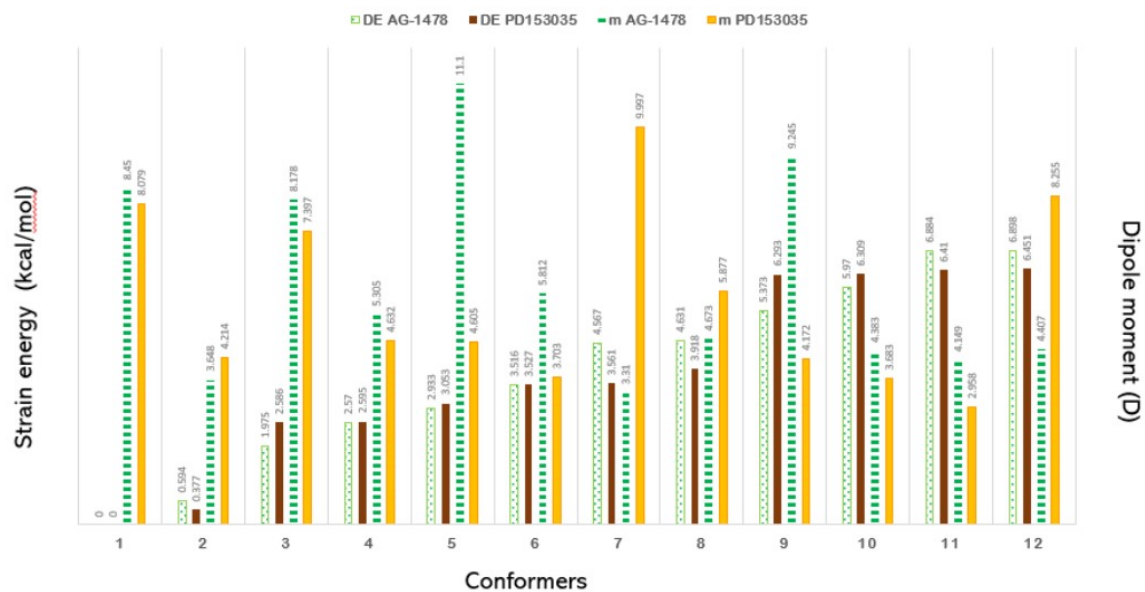

Fig. S7 Comparison of the strain energies and dipole moments of the first twelve low energy conformers of PD153035 (solid brown and yellow,  $\lambda_1 = 330$  nm,  $\lambda_2=337.5$  nm) and AG-1478 (pattern green,  $\lambda_1 = 329.5$  nm,  $\lambda_2=337$  nm) at the SE of 5.0 kcal/mol in DMSO obtained using B3LYP/6-311G++(d,p) method (refer to Table 4).

Table S1.1 The bond length of the four low-lying PD153035 conformers obtained from calculations and the EGFR structure from the database (Å).\*

| No | Bond           | GAS1     | GAS2     | GAS3     | GAS4     | EGFR <sup>#</sup> |
|----|----------------|----------|----------|----------|----------|-------------------|
| 1  | C(1) - C(2)    | 1.374961 | 1.375499 | 1.378953 | 1.374574 | 1.406076          |
| 2  | C(1) - C(6)    | 1.436943 | 1.429076 | 1.431803 | 1.440443 | 1.411238          |
| 3  | C(1) - O(26)   | 1.35067  | 1.355441 | 1.355827 | 1.349655 | 1.368002          |
| 4  | C(2) - C(3)    | 1.416891 | 1.412946 | 1.414442 | 1.417712 | 1.405626          |
| 6  | C(3) - C(4)    | 1.416068 | 1.415517 | 1.418493 | 1.421591 | 1.423275          |
| 7  | C(3) - N(13)   | 1.366582 | 1.367603 | 1.368062 | 1.36251  | 1.355785          |
| 8  | C(4) - C(5)    | 1.420517 | 1.419523 | 1.414854 | 1.421015 | 1.418124          |
| 9  | C(4) - C(8)    | 1.438756 | 1.437208 | 1.440857 | 1.426598 | 1.422878          |
| 10 | C(5) - C(6)    | 1.376512 | 1.376408 | 1.37407  | 1.374152 | 1.410975          |
| 12 | C(6) - O(27)   | 1.355203 | 1.360233 | 1.367897 | 1.35333  | 1.369789          |
| 13 | C(8) - N(12)   | 1.323383 | 1.324422 | 1.32293  | 1.326674 | 1.361402          |
| 14 | C(8) - N(24)   | 1.376641 | 1.373009 | 1.373684 | 1.393538 | 1.368241          |
| 16 | C(10) - N(12)  | 1.351061 | 1.351141 | 1.352336 | 1.348355 | 1.353315          |
| 17 | C(10) - N(13)  | 1.310372 | 1.310643 | 1.30983  | 1.313944 | 1.350758          |
| 18 | C(14) - C(15)  | 1.405748 | 1.400659 | 1.405378 | 1.402224 | 1.414659          |
| 19 | C(14) - C(16)  | 1.40232  | 1.406843 | 1.402087 | 1.401314 | 1.419205          |
| 20 | C(14) - N(24)  | 1.405746 | 1.407514 | 1.406484 | 1.411469 | 1.370434          |
| 21 | C(15) - C(17)  | 1.387069 | 1.39273  | 1.387114 | 1.389335 | 1.406866          |
| 23 | C(16) - C(19)  | 1.390832 | 1.383072 | 1.390818 | 1.39037  | 1.408847          |
| 25 | C(17) - C(21)  | 1.394865 | 1.393176 | 1.394846 | 1.395036 | 1.404607          |
| 27 | C(19) - C(21)  | 1.389371 | 1.388238 | 1.389361 | 1.390435 | 1.405459          |
| 28 | C(19) - BR(36) | 1.921133 | 1.922455 | 1.921074 | 1.920391 | 1.861498          |
| 31 | O(26) - C(32)  | 1.425091 | 1.436132 | 1.426534 | 1.424806 | 1.438359          |
| 32 | O(27) - C(28)  | 1.420638 | 1.433016 | 1.435632 | 1.423385 | 1.440611          |

\*The nomenclature of PD153035 see Fig. S1.

#The EGFR database (<http://crdd.osdd.net/raghava/egfrindb/>, EGIN000762)

Table S1.2 The dihedral angles of the four low-lying PD153035 conformers obtained from calculations and the crystal structure (°).\*

| No | Dihedral                       | Angles | 1        | 2        | 3        | 4        | EGFR#    |
|----|--------------------------------|--------|----------|----------|----------|----------|----------|
| 1  | C(1) - C(2) - C(3) - C(4)      |        | 0        | 0        | -0.25944 | -2.05633 |          |
| 2  | C(1) - C(2) - C(3) - N(13)     |        | 180      | -180     | 179.972  | 176.0014 |          |
| 3  | C(1) - C(6) - C(5) - C(4)      |        | 0        | 0        | -0.58383 | -0.10653 |          |
| 5  | C(1) - C(6) - O(27) - C(28)    |        | 180      | 180      | 68.99264 | -178.943 | 84.99957 |
| 9  | C(2) - C(1) - C(6) - C(5)      |        | 0.019782 | 0        | 1.470069 | 1.731218 |          |
| 10 | C(2) - C(1) - C(6) - O(27)     |        | -179.972 | -180     | 177.019  | -178.021 |          |
| 11 | C(2) - C(1) - O(26) - C(32)    |        | 0        | 0        | -2.19455 | -0.75485 |          |
| 12 | C(2) - C(3) - C(4) - C(5)      |        | 0        | 0        | 1.135049 | 3.627038 |          |
| 13 | C(2) - C(3) - C(4) - C(8)      |        | -180     | 180      | -179.18  | -178.996 |          |
| 14 | C(2) - C(3) - N(13) - C(10)    |        | -180     | -180     | 179.7474 | -176.841 |          |
| 15 | C(3) - C(2) - C(1) - C(6)      |        | -0.01978 | 0        | -1.0438  | -0.6215  |          |
| 16 | C(3) - C(2) - C(1) - O(26)     |        | 180      | 180      | 178.272  | -179.739 |          |
| 17 | C(3) - C(4) - C(5) - C(6)      |        | 0        | 0        | -0.71107 | -2.56476 |          |
| 19 | C(3) - C(4) - C(8) - N(12)     |        | 0        | 0        | -0.81996 | -5.38802 |          |
| 20 | C(3) - C(4) - C(8) - N(24)     |        | 179.9802 | -179.98  | 179.1909 | 179.5804 |          |
| 22 | C(3) - N(13) - C(10) - N(12)   |        | 0        | 0        | -0.40348 | -3.66736 |          |
| 24 | C(4) - C(3) - N(13) - C(10)    |        | 0        | 0        | -0.02798 | 1.155552 |          |
| 25 | C(4) - C(5) - C(6) - O(27)     |        | -180     | -180     | -176.242 | 179.6154 |          |
| 26 | C(4) - C(8) - N(12) - C(10)    |        | 0        | 0        | 0.48092  | 3.424284 |          |
| 27 | C(4) - C(8) - N(24) - C(14)    |        | 180      | 180      | 179.5335 | -50.3081 |          |
| 29 | C(5) - C(4) - C(3) - N(13)     |        | -180     | 180      | -179.105 | -174.356 |          |
| 30 | C(5) - C(4) - C(8) - N(12)     |        | 180      | -179.972 | 178.8392 | 171.8009 |          |
| 31 | C(5) - C(4) - C(8) - N(24)     |        | 0        | 0        | -1.15029 | -3.23107 |          |
| 32 | C(5) - C(6) - C(1) - O(26)     |        | -179.98  | -179.98  | -177.908 | -179.066 |          |
| 33 | C(5) - C(6) - O(27) - C(28)    |        | 0        | 0        | -115.427 | 1.320565 | -97.2081 |
| 35 | C(6) - C(1) - O(26) - C(32)    |        | 179.972  | 179.972  | 177.1469 | -179.912 |          |
| 36 | C(6) - C(5) - C(4) - C(8)      |        | 180      | 180      | 179.639  | -179.649 |          |
| 42 | C(8) - C(4) - C(3) - N(13)     |        | 0        | -0.01978 | 0.580472 | 3.021613 |          |
| 45 | C(8) - N(12) - C(10) - N(13)   |        | 0        | 0        | 0.170174 | 1.406113 |          |
| 46 | C(8) - N(24) - C(14) - C(15)   |        | -179.952 | 0        | 178.7633 | 168.3556 |          |
| 47 | C(8) - N(24) - C(14) - C(16)   |        | 0.048457 | -180     | -1.44442 | -13.7845 |          |
| 49 | C(10) - N(12) - C(8) - N(24)   |        | -180     | 180      | -179.531 | 178.8693 |          |
| 50 | N(12) - C(8) - N(24) - C(14)   |        | 0        | 0        | -0.45543 | 134.3467 |          |
| 52 | C(14) - C(15) - C(17) - C(21)  |        | 0        | 0        | 0        | 1.046424 |          |
| 54 | C(14) - C(16) - C(19) - C(21)  |        | 0        | 0        | -0.03426 | 1.309255 |          |
| 55 | C(14) - C(16) - C(19) - BR(36) |        | 180      | -180     | 180      | -179.627 |          |
| 56 | C(15) - C(14) - C(16) - C(19)  |        | 0        | 0        | 0.048457 | -1.21885 |          |
| 59 | C(15) - C(17) - C(21) - C(19)  |        | 0.019782 | 0        | 0        | -0.97317 |          |
| 61 | C(16) - C(14) - C(15) - C(17)  |        | 0        | 0        | -0.02798 | 0.071326 |          |
| 64 | C(16) - C(19) - C(21) - C(17)  |        | 0        | 0        | 0        | -0.21306 |          |
| 66 | C(17) - C(15) - C(14) - N(24)  |        | -179.972 | 180      | 179.7702 | 178.0062 |          |
| 67 | C(17) - C(21) - C(19) - BR(36) |        | -180     | 180      | 180      | -179.271 |          |

|    |         |         |         |       |          |          |          |          |
|----|---------|---------|---------|-------|----------|----------|----------|----------|
| 71 | C(19) - | C(16) - | C(14) - | N(24) | 180      | -179.972 | -179.736 | -179.054 |
| 78 | O(26) - | C(1) -  | C(6) -  | O(27) | 0.027976 | 0.027976 | -2.35908 | 1.182337 |

\*The nomenclature of PD153035 see Fig. S1.

#The EGFR database (<http://crdd.osdd.net/raghava/egfrindb/>, EGIN000762)

Table S1.3 The dihedral angles of the crystal structure from the EGFR database.\*

| No | Dihedral                      | Angle    | EGFR# |
|----|-------------------------------|----------|-------|
| 1  | C(1) - C(3) - C(5) - C(6)     | -1.75691 |       |
| 2  | C(1) - C(3) - C(5) - O(19)    | -179.559 |       |
| 3  | C(1) - C(9) - N(7) - C(8)     | 0.459275 |       |
| 4  | C(1) - C(9) - N(11) - C(12)   | -157.793 |       |
| 6  | C(1) - C(2) - C(4) - C(6)     | -1.04755 |       |
| 8  | C(1) - C(2) - N(10) - C(8)    | -1.35855 |       |
| 9  | C(2) - C(4) - C(6) - C(5)     | -3.05966 |       |
| 10 | C(2) - C(4) - C(6) - O(20)    | 178.3095 |       |
| 11 | C(2) - N(10) - C(8) - N(7)    | -1.54915 |       |
| 13 | C(2) - C(1) - C(3) - C(5)     | -2.26071 |       |
| 15 | C(2) - C(1) - C(9) - N(7)     | -3.2301  |       |
| 16 | C(2) - C(1) - C(9) - N(11)    | 175.098  |       |
| 17 | C(3) - C(1) - C(9) - N(7)     | 178.051  |       |
| 18 | C(3) - C(1) - C(9) - N(11)    | -3.62104 |       |
| 19 | C(3) - C(1) - C(2) - C(4)     | 3.668424 |       |
| 20 | C(3) - C(1) - C(2) - N(10)    | -177.485 |       |
| 21 | C(3) - C(5) - C(6) - C(4)     | 4.443516 |       |
| 22 | C(3) - C(5) - C(6) - O(20)    | -176.939 |       |
| 23 | C(3) - C(5) - O(19) - C(21)   | -97.2081 |       |
| 24 | C(4) - C(2) - N(10) - C(8)    | 177.5085 |       |
| 25 | C(4) - C(2) - C(1) - C(9)     | -175.135 |       |
| 26 | C(4) - C(6) - C(5) - O(19)    | -177.754 |       |
| 27 | C(4) - C(6) - O(20) - C(22)   | -84.7553 |       |
| 28 | C(5) - C(3) - C(1) - C(9)     | 176.4439 |       |
| 30 | C(5) - C(6) - O(20) - C(22)   | 96.62187 |       |
| 34 | C(6) - C(4) - C(2) - N(10)    | -179.912 |       |
| 35 | C(6) - C(5) - C(3) - H(23)    | 177.7595 |       |
| 36 | C(6) - C(5) - O(19) - C(21)   | 84.99957 |       |
| 40 | N(7) - C(9) - N(11) - C(12)   | 20.48827 |       |
| 42 | C(8) - N(7) - C(9) - N(11)    | -177.855 |       |
| 43 | C(9) - N(7) - C(8) - N(10)    | 2.019067 |       |
| 46 | C(9) - C(1) - C(2) - N(10)    | 3.710668 |       |
| 47 | C(9) - N(11) - C(12) - C(16)  | -33.6828 |       |
| 48 | C(9) - N(11) - C(12) - C(17)  | 146.0471 |       |
| 50 | N(11) - C(12) - C(16) - C(14) | 177.5611 |       |
| 52 | N(11) - C(12) - C(17) - C(15) | -177.983 |       |
| 54 | C(12) - C(16) - C(14) - C(13) | 1.38126  |       |
| 56 | C(12) - C(17) - C(15) - C(13) | -0.58784 |       |



|    |         |         |       |   |       |          |
|----|---------|---------|-------|---|-------|----------|
| 60 | C(14) - | C(13) - | C(15) | - | C(17) | -0.24469 |
| 62 | C(14) - | C(16) - | C(12) | - | C(17) | -2.16211 |
| 63 | C(15) - | C(13) - | C(14) | - | C(16) | -0.15195 |
| 65 | C(15) - | C(17) - | C(12) | - | C(16) | 1.769788 |
| 75 | O(19) - | C(5) -  | C(6)  | - | O(20) | 0.862754 |

\*The nomenclature of PD153035 see Fig. S1.

#The EGFR database (<http://crdd.osdd.net/raghava/egfrindb/>, EGIN000762)

Table S1.4 The nomenclature conversion between the calculated and the EGFR database in Table 1.3.

| No | Atom1        | Atom2  | Atoms1-2 |
|----|--------------|--------|----------|
|    | Calculations |        | Crystal  |
| 1  | C(3) -       | C(1)   | 5,4      |
| 2  | C(4) -       | C(2)   | 2,3      |
| 3  | C(5) -       | C(3)   | 6,5      |
| 4  | C(6) -       | C(4)   | 1,2      |
| 5  | C(6) -       | C(5)   | 1,6      |
| 6  | C(9) -       | N(7)   | 8,12     |
| 7  | N(10) -      | C(8)   | 13,10    |
| 8  | C(1) -       | C(9)   | 4,8      |
| 9  | C(2) -       | N(10)  | 3,13     |
| 10 | C(2) -       | C(1)   | 3,4      |
| 11 | C(8) -       | N(7)   | 10,12    |
| 12 | C(9) -       | N(11)  | 8,24     |
| 13 | N(11) -      | C(12)  | 24,14    |
| 14 | C(14) -      | C(13)  | 19,21    |
| 15 | C(15) -      | C(13)  | 17,21    |
| 16 | C(16) -      | C(14)  | 16,19    |
| 17 | C(17) -      | C(15)  | 15,17    |
| 18 | C(12) -      | C(16)  | 14,16    |
| 19 | C(12) -      | C(17)  | 14,15    |
| 20 | C(14) -      | Br(18) | 19,36    |
| 21 | C(5) -       | O(19)  | 6,27     |
| 22 | C(6) -       | O(20)  | 1,26     |
| 23 | O(19) -      | C(21)  | 27,28    |
| 24 | O(20) -      | C(22)  | 26,32    |

Table S2.1 The 22 clustered lowest lying PD153035 conformers calculated using DFT B3LYP/6-311++G(d,p) in gas phase.

Sorted clusters

| #  | Energy        | RelativeEnergy (kcal/mol) | Dipole | File Name                                                 | Cluster Size | %      |
|----|---------------|---------------------------|--------|-----------------------------------------------------------|--------------|--------|
| 1  | -3507.2195541 | 0.000                     | 3.2556 | /home/vw900/Amber/EGFR/AG-1478/Br-Feng/All-Gas/min-02.log | 1            | 47.802 |
| 2  | -3507.2193768 | 0.111                     | 5.8420 | /home/vw900/Amber/EGFR/AG-1478/Br-Feng/All-Gas/min-01.log | 1            | 39.488 |
| 3  | -3507.2173955 | 1.355                     | 5.5328 | /home/vw900/Amber/EGFR/AG-1478/Br-Feng/All-Gas/min-03.log | 1            | 4.668  |
| 4  | -3507.2173938 | 1.356                     | 3.9067 | /home/vw900/Amber/EGFR/AG-1478/Br-Feng/All-Gas/min-05.log | 1            | 4.659  |
| 5  | -3507.2162792 | 2.055                     | 2.8600 | /home/vw900/Amber/EGFR/AG-1478/Br-Feng/All-Gas/min-08.log | 1            | 1.402  |
| 6  | -3507.2162673 | 2.062                     | 3.0472 | /home/vw900/Amber/EGFR/AG-1478/Br-Feng/All-Gas/min-04.log | 1            | 1.384  |
| 7  | -3507.2146364 | 3.086                     | 3.9857 | /home/vw900/Amber/EGFR/AG-1478/Br-Feng/All-Gas/min-07.log | 1            | 0.239  |
| 8  | -3507.2144194 | 3.222                     | 6.9975 | /home/vw900/Amber/EGFR/AG-1478/Br-Feng/All-Gas/min-06.log | 1            | 0.189  |
| 9  | -3507.2127574 | 4.265                     | 3.2646 | /home/vw900/Amber/EGFR/AG-1478/Br-Feng/All-Gas/min-14.log | 1            | 0.031  |
| 10 | -3507.2126927 | 4.306                     | 2.0375 | /home/vw900/Amber/EGFR/AG-1478/Br-Feng/All-Gas/min-09.log | 1            | 0.029  |
| 11 | -3507.2124371 | 4.466                     | 3.0344 | /home/vw900/Amber/EGFR/AG-1478/Br-Feng/All-Gas/min-10.log | 1            | 0.022  |
| 12 | -3507.2123526 | 4.519                     | 3.7312 | /home/vw900/Amber/EGFR/AG-1478/Br-Feng/All-Gas/min-15.log | 1            | 0.020  |
| 13 | -3507.2123420 | 4.526                     | 3.0196 | /home/vw900/Amber/EGFR/AG-1478/Br-Feng/All-Gas/min-16.log | 1            | 0.020  |
| 14 | -3507.2123328 | 4.531                     | 5.7493 | /home/vw900/Amber/EGFR/AG-1478/Br-Feng/All-Gas/min-13.log | 1            | 0.020  |
| 15 | -3507.2114231 | 5.102                     | 4.7455 | /home/vw900/Amber/EGFR/AG-1478/Br-Feng/All-Gas/min-12.log | 1            | 0.007  |
| 16 | -3507.2113024 | 5.178                     | 4.0248 | /home/vw900/Amber/EGFR/AG-1478/Br-Feng/All-Gas/min-17.log | 1            | 0.007  |
| 17 | -3507.2112912 | 5.185                     | 3.5527 | /home/vw900/Amber/EGFR/AG-1478/Br-Feng/All-Gas/min-18.log | 1            | 0.006  |
| 18 | -3507.2111928 | 5.247                     | 5.2145 | /home/vw900/Amber/EGFR/AG-1478/Br-Feng/All-Gas/min-11.log | 1            | 0.006  |
| 19 | -3507.2076176 | 7.490                     | 2.9118 | /home/vw900/Amber/EGFR/AG-1478/Br-Feng/All-Gas/min-21.log | 1            | 0.000  |
| 20 | -3507.2075100 | 7.558                     | 3.5230 | /home/vw900/Amber/EGFR/AG-1478/Br-Feng/All-Gas/min-20.log | 1            | 0.000  |
| 21 | -3507.2075081 | 7.559                     | 3.5035 | /home/vw900/Amber/EGFR/AG-1478/Br-Feng/All-Gas/min-19.log | 1            | 0.000  |
| 22 | -3507.2072306 | 7.733                     | 2.7764 | /home/vw900/Amber/EGFR/AG-1478/Br-Feng/All-Gas/min-22.log | 1            | 0.000  |

Table S2.2 The 22 clustered lowest lying PD153035 conformers calculated using DFT B3LYP/6-311++G(d,p) in Toluene solvent.

Sorted clusters

| #  | Energy        | RelativeEnergy (kcal/mol) | Dipole | File Name                                                     | Cluster Size | %      |
|----|---------------|---------------------------|--------|---------------------------------------------------------------|--------------|--------|
| 1  | -3507.2267308 | 0.000                     | 6.8248 | /home/vw900/Amber/EGFR/AG-1478/Br-Feng/All-Toluene/min-01.log | 1            | 49.378 |
| 2  | -3507.2266315 | 0.062                     | 3.6844 | /home/vw900/Amber/EGFR/AG-1478/Br-Feng/All-Toluene/min-02.log | 1            | 44.367 |
| 3  | -3507.2239178 | 1.765                     | 6.3786 | /home/vw900/Amber/EGFR/AG-1478/Br-Feng/All-Toluene/min-03.log | 1            | 2.382  |
| 4  | -3507.2237269 | 1.885                     | 4.2869 | /home/vw900/Amber/EGFR/AG-1478/Br-Feng/All-Toluene/min-05.log | 1            | 1.939  |
| 5  | -3507.2229087 | 2.398                     | 3.2611 | /home/vw900/Amber/EGFR/AG-1478/Br-Feng/All-Toluene/min-08.log | 1            | 0.803  |
| 6  | -3507.2228781 | 2.418                     | 3.6826 | /home/vw900/Amber/EGFR/AG-1478/Br-Feng/All-Toluene/min-04.log | 1            | 0.777  |
| 7  | -3507.2213671 | 3.366                     | 8.2622 | /home/vw900/Amber/EGFR/AG-1478/Br-Feng/All-Toluene/min-06.log | 1            | 0.152  |
| 8  | -3507.2213090 | 3.402                     | 4.7342 | /home/vw900/Amber/EGFR/AG-1478/Br-Feng/All-Toluene/min-07.log | 1            | 0.143  |
| 9  | -3507.2189864 | 4.860                     | 3.5360 | /home/vw900/Amber/EGFR/AG-1478/Br-Feng/All-Toluene/min-14.log | 1            | 0.012  |
| 10 | -3507.2188627 | 4.937                     | 2.4584 | /home/vw900/Amber/EGFR/AG-1478/Br-Feng/All-Toluene/min-09.log | 1            | 0.010  |
| 11 | -3507.2187408 | 5.014                     | 3.5321 | /home/vw900/Amber/EGFR/AG-1478/Br-Feng/All-Toluene/min-10.log | 1            | 0.009  |
| 12 | -3507.2186094 | 5.096                     | 4.1797 | /home/vw900/Amber/EGFR/AG-1478/Br-Feng/All-Toluene/min-15.log | 1            | 0.008  |
| 13 | -3507.2183857 | 5.237                     | 6.7994 | /home/vw900/Amber/EGFR/AG-1478/Br-Feng/All-Toluene/min-13.log | 1            | 0.006  |
| 14 | -3507.2181753 | 5.369                     | 3.5279 | /home/vw900/Amber/EGFR/AG-1478/Br-Feng/All-Toluene/min-16.log | 1            | 0.005  |
| 15 | -3507.2175535 | 5.759                     | 5.7375 | /home/vw900/Amber/EGFR/AG-1478/Br-Feng/All-Toluene/min-12.log | 1            | 0.003  |
| 16 | -3507.2174413 | 5.829                     | 4.7937 | /home/vw900/Amber/EGFR/AG-1478/Br-Feng/All-Toluene/min-17.log | 1            | 0.002  |
| 17 | -3507.2174171 | 5.844                     | 4.2193 | /home/vw900/Amber/EGFR/AG-1478/Br-Feng/All-Toluene/min-18.log | 1            | 0.002  |
| 18 | -3507.2172937 | 5.922                     | 6.2527 | /home/vw900/Amber/EGFR/AG-1478/Br-Feng/All-Toluene/min-11.log | 1            | 0.002  |
| 19 | -3507.2132799 | 8.440                     | 3.4398 | /home/vw900/Amber/EGFR/AG-1478/Br-Feng/All-Toluene/min-21.log | 1            | 0.000  |
| 20 | -3507.2132101 | 8.484                     | 4.2607 | /home/vw900/Amber/EGFR/AG-1478/Br-Feng/All-Toluene/min-20.log | 1            | 0.000  |
| 21 | -3507.2130900 | 8.560                     | 4.2819 | /home/vw900/Amber/EGFR/AG-1478/Br-Feng/All-Toluene/min-19.log | 1            | 0.000  |
| 22 | -3507.2129125 | 8.671                     | 3.3014 | /home/vw900/Amber/EGFR/AG-1478/Br-Feng/All-Toluene/min-22.log | 1            | 0.000  |

Table S2.3 The 22 clustered lowest lying PD153035 conformers calculated using DFT B3LYP/6-311++G(d,p) in ethanol solvent.

Sorted clusters

| #  | Energy        | RelativeEnergy (kcal/mol) | Dipole | File Name                                                  | Cluster Size | %      |
|----|---------------|---------------------------|--------|------------------------------------------------------------|--------------|--------|
| 1  | -3507.2356315 | 0.000                     | 7.9964 | /home/vw900/Amber/EGFR/AG-1478/Br-Feng/All-EtOH/min-01.log | 1            | 63.511 |
| 2  | -3507.2350687 | 0.353                     | 4.1774 | /home/vw900/Amber/EGFR/AG-1478/Br-Feng/All-EtOH/min-02.log | 1            | 34.628 |
| 3  | -3507.2316011 | 2.529                     | 7.3316 | /home/vw900/Amber/EGFR/AG-1478/Br-Feng/All-EtOH/min-03.log | 1            | 0.825  |
| 4  | -3507.2310415 | 2.880                     | 4.6106 | /home/vw900/Amber/EGFR/AG-1478/Br-Feng/All-EtOH/min-05.log | 1            | 0.451  |
| 5  | -3507.2301882 | 3.416                     | 4.5346 | /home/vw900/Amber/EGFR/AG-1478/Br-Feng/All-EtOH/min-04.log | 1            | 0.180  |
| 6  | -3507.2301587 | 3.434                     | 3.6758 | /home/vw900/Amber/EGFR/AG-1478/Br-Feng/All-EtOH/min-08.log | 1            | 0.174  |
| 7  | -3507.2299675 | 3.554                     | 9.8794 | /home/vw900/Amber/EGFR/AG-1478/Br-Feng/All-EtOH/min-06.log | 1            | 0.142  |
| 8  | -3507.2294349 | 3.888                     | 5.7961 | /home/vw900/Amber/EGFR/AG-1478/Br-Feng/All-EtOH/min-07.log | 1            | 0.080  |
| 9  | -3507.2257604 | 6.194                     | 4.1293 | /home/vw900/Amber/EGFR/AG-1478/Br-Feng/All-EtOH/min-10.log | 1            | 0.002  |
| 10 | -3507.2257590 | 6.195                     | 3.6797 | /home/vw900/Amber/EGFR/AG-1478/Br-Feng/All-EtOH/min-14.log | 1            | 0.002  |
| 11 | -3507.2255992 | 6.295                     | 2.9297 | /home/vw900/Amber/EGFR/AG-1478/Br-Feng/All-EtOH/min-09.log | 1            | 0.001  |
| 12 | -3507.2255060 | 6.354                     | 4.7178 | /home/vw900/Amber/EGFR/AG-1478/Br-Feng/All-EtOH/min-15.log | 1            | 0.001  |
| 13 | -3507.2254875 | 6.365                     | 8.1556 | /home/vw900/Amber/EGFR/AG-1478/Br-Feng/All-EtOH/min-13.log | 1            | 0.001  |
| 14 | -3507.2249005 | 6.734                     | 4.2448 | /home/vw900/Amber/EGFR/AG-1478/Br-Feng/All-EtOH/min-16.log | 1            | 0.001  |
| 15 | -3507.2243805 | 7.060                     | 6.9818 | /home/vw900/Amber/EGFR/AG-1478/Br-Feng/All-EtOH/min-12.log | 1            | 0.000  |
| 16 | -3507.2242944 | 7.114                     | 5.8035 | /home/vw900/Amber/EGFR/AG-1478/Br-Feng/All-EtOH/min-17.log | 1            | 0.000  |
| 17 | -3507.2241715 | 7.191                     | 7.6062 | /home/vw900/Amber/EGFR/AG-1478/Br-Feng/All-EtOH/min-11.log | 1            | 0.000  |
| 18 | -3507.2241493 | 7.205                     | 5.0393 | /home/vw900/Amber/EGFR/AG-1478/Br-Feng/All-EtOH/min-18.log | 1            | 0.000  |
| 19 | -3507.2194630 | 10.146                    | 5.2213 | /home/vw900/Amber/EGFR/AG-1478/Br-Feng/All-EtOH/min-20.log | 1            | 0.000  |
| 20 | -3507.2194227 | 10.171                    | 4.0466 | /home/vw900/Amber/EGFR/AG-1478/Br-Feng/All-EtOH/min-21.log | 1            | 0.000  |
| 21 | -3507.2191227 | 10.359                    | 5.2322 | /home/vw900/Amber/EGFR/AG-1478/Br-Feng/All-EtOH/min-19.log | 1            | 0.000  |
| 22 | -3507.2190744 | 10.390                    | 3.9839 | /home/vw900/Amber/EGFR/AG-1478/Br-Feng/All-EtOH/min-22.log | 1            | 0.000  |

Table S2.4 The 22 clustered lowest lying PD153035 conformers calculated using DFT B3LYP/6-311++G(d,p) in MeOH solvent.

Sorted clusters

| #  | Energy        | RelativeEnergy (kcal/mol) | Dipole | File Name                                                  | Cluster Size | %      |
|----|---------------|---------------------------|--------|------------------------------------------------------------|--------------|--------|
| 1  | -3507.2359428 | 0.000                     | 8.0380 | /home/vw900/Amber/EGFR/AG-1478/Br-Feng/All-MeOH/min-01.log | 1            | 64.017 |
| 2  | -3507.2353613 | 0.365                     | 4.1954 | /home/vw900/Amber/EGFR/AG-1478/Br-Feng/All-MeOH/min-02.log | 1            | 34.208 |
| 3  | -3507.2318667 | 2.558                     | 7.3642 | /home/vw900/Amber/EGFR/AG-1478/Br-Feng/All-MeOH/min-03.log | 1            | 0.792  |
| 4  | -3507.2312897 | 2.920                     | 4.6213 | /home/vw900/Amber/EGFR/AG-1478/Br-Feng/All-MeOH/min-05.log | 1            | 0.425  |
| 5  | -3507.2304298 | 3.459                     | 4.5700 | /home/vw900/Amber/EGFR/AG-1478/Br-Feng/All-MeOH/min-04.log | 1            | 0.168  |
| 6  | -3507.2303962 | 3.481                     | 3.6896 | /home/vw900/Amber/EGFR/AG-1478/Br-Feng/All-MeOH/min-08.log | 1            | 0.162  |
| 7  | -3507.2302728 | 3.558                     | 9.9383 | /home/vw900/Amber/EGFR/AG-1478/Br-Feng/All-MeOH/min-06.log | 1            | 0.142  |
| 8  | -3507.2297221 | 3.904                     | 5.8369 | /home/vw900/Amber/EGFR/AG-1478/Br-Feng/All-MeOH/min-07.log | 1            | 0.078  |
| 9  | -3507.2259934 | 6.243                     | 4.1506 | /home/vw900/Amber/EGFR/AG-1478/Br-Feng/All-MeOH/min-10.log | 1            | 0.001  |
| 10 | -3507.2259796 | 6.252                     | 3.6815 | /home/vw900/Amber/EGFR/AG-1478/Br-Feng/All-MeOH/min-14.log | 1            | 0.001  |
| 11 | -3507.2258191 | 6.353                     | 2.9442 | /home/vw900/Amber/EGFR/AG-1478/Br-Feng/All-MeOH/min-09.log | 1            | 0.001  |
| 12 | -3507.2257337 | 6.406                     | 4.7382 | /home/vw900/Amber/EGFR/AG-1478/Br-Feng/All-MeOH/min-15.log | 1            | 0.001  |
| 13 | -3507.2257304 | 6.408                     | 8.2054 | /home/vw900/Amber/EGFR/AG-1478/Br-Feng/All-MeOH/min-13.log | 1            | 0.001  |
| 14 | -3507.2251279 | 6.786                     | 4.2730 | /home/vw900/Amber/EGFR/AG-1478/Br-Feng/All-MeOH/min-16.log | 1            | 0.001  |
| 15 | -3507.2246080 | 7.113                     | 7.0270 | /home/vw900/Amber/EGFR/AG-1478/Br-Feng/All-MeOH/min-12.log | 1            | 0.000  |
| 16 | -3507.2245240 | 7.165                     | 5.8420 | /home/vw900/Amber/EGFR/AG-1478/Br-Feng/All-MeOH/min-17.log | 1            | 0.000  |
| 17 | -3507.2244032 | 7.241                     | 7.6584 | /home/vw900/Amber/EGFR/AG-1478/Br-Feng/All-MeOH/min-11.log | 1            | 0.000  |
| 18 | -3507.2243714 | 7.261                     | 5.0686 | /home/vw900/Amber/EGFR/AG-1478/Br-Feng/All-MeOH/min-18.log | 1            | 0.000  |
| 19 | -3507.2196679 | 10.213                    | 5.2535 | /home/vw900/Amber/EGFR/AG-1478/Br-Feng/All-MeOH/min-20.log | 1            | 0.000  |
| 20 | -3507.2196227 | 10.241                    | 4.0662 | /home/vw900/Amber/EGFR/AG-1478/Br-Feng/All-MeOH/min-21.log | 1            | 0.000  |
| 21 | -3507.2193176 | 10.432                    | 5.2650 | /home/vw900/Amber/EGFR/AG-1478/Br-Feng/All-MeOH/min-19.log | 1            | 0.000  |
| 22 | -3507.2192745 | 10.459                    | 4.0096 | /home/vw900/Amber/EGFR/AG-1478/Br-Feng/All-MeOH/min-22.log | 1            | 0.000  |

Table S2.5 The 22 clustered lowest lying PD153035 conformers calculated using DFT B3LYP/6-311++G(d,p) in ACN solvent.

Sorted clusters

| #  | Energy        | RelativeEnergy (kcal/mol) | Dipole | File Name                                                                 | Cluster Size | %      |
|----|---------------|---------------------------|--------|---------------------------------------------------------------------------|--------------|--------|
| 1  | -3507.2360298 | 0.000                     | 8.0497 | <a href="#">/home/vw900/Amber/EGFR/AG-1478/Br-Feng/All-ACN/min-01.log</a> | 1            | 64.159 |
| 2  | -3507.2354430 | 0.368                     | 4.2006 | <a href="#">/home/vw900/Amber/EGFR/AG-1478/Br-Feng/All-ACN/min-02.log</a> | 1            | 34.089 |
| 3  | -3507.2319408 | 2.566                     | 7.3731 | <a href="#">/home/vw900/Amber/EGFR/AG-1478/Br-Feng/All-ACN/min-03.log</a> | 1            | 0.782  |
| 4  | -3507.2313590 | 2.931                     | 4.6243 | <a href="#">/home/vw900/Amber/EGFR/AG-1478/Br-Feng/All-ACN/min-05.log</a> | 1            | 0.418  |
| 5  | -3507.2304971 | 3.472                     | 4.5800 | <a href="#">/home/vw900/Amber/EGFR/AG-1478/Br-Feng/All-ACN/min-04.log</a> | 1            | 0.165  |
| 6  | -3507.2304623 | 3.494                     | 3.6934 | <a href="#">/home/vw900/Amber/EGFR/AG-1478/Br-Feng/All-ACN/min-08.log</a> | 1            | 0.159  |
| 7  | -3507.2303582 | 3.559                     | 9.9549 | <a href="#">/home/vw900/Amber/EGFR/AG-1478/Br-Feng/All-ACN/min-06.log</a> | 1            | 0.142  |
| 8  | -3507.2298024 | 3.908                     | 5.8483 | <a href="#">/home/vw900/Amber/EGFR/AG-1478/Br-Feng/All-ACN/min-07.log</a> | 1            | 0.078  |
| 9  | -3507.2260583 | 6.257                     | 4.1567 | <a href="#">/home/vw900/Amber/EGFR/AG-1478/Br-Feng/All-ACN/min-10.log</a> | 1            | 0.001  |
| 10 | -3507.2260410 | 6.268                     | 3.6820 | <a href="#">/home/vw900/Amber/EGFR/AG-1478/Br-Feng/All-ACN/min-14.log</a> | 1            | 0.001  |
| 11 | -3507.2258804 | 6.369                     | 2.9482 | <a href="#">/home/vw900/Amber/EGFR/AG-1478/Br-Feng/All-ACN/min-09.log</a> | 1            | 0.001  |
| 12 | -3507.2257982 | 6.420                     | 8.2193 | <a href="#">/home/vw900/Amber/EGFR/AG-1478/Br-Feng/All-ACN/min-13.log</a> | 1            | 0.001  |
| 13 | -3507.2257972 | 6.421                     | 4.7439 | <a href="#">/home/vw900/Amber/EGFR/AG-1478/Br-Feng/All-ACN/min-15.log</a> | 1            | 0.001  |
| 14 | -3507.2251914 | 6.801                     | 4.2810 | <a href="#">/home/vw900/Amber/EGFR/AG-1478/Br-Feng/All-ACN/min-16.log</a> | 1            | 0.001  |
| 15 | -3507.2246715 | 7.127                     | 7.0396 | <a href="#">/home/vw900/Amber/EGFR/AG-1478/Br-Feng/All-ACN/min-12.log</a> | 1            | 0.000  |
| 16 | -3507.2245881 | 7.180                     | 5.8528 | <a href="#">/home/vw900/Amber/EGFR/AG-1478/Br-Feng/All-ACN/min-17.log</a> | 1            | 0.000  |
| 17 | -3507.2244679 | 7.255                     | 7.6731 | <a href="#">/home/vw900/Amber/EGFR/AG-1478/Br-Feng/All-ACN/min-11.log</a> | 1            | 0.000  |
| 18 | -3507.2244333 | 7.277                     | 5.0768 | <a href="#">/home/vw900/Amber/EGFR/AG-1478/Br-Feng/All-ACN/min-18.log</a> | 1            | 0.000  |
| 19 | -3507.2197250 | 10.231                    | 5.2625 | <a href="#">/home/vw900/Amber/EGFR/AG-1478/Br-Feng/All-ACN/min-20.log</a> | 1            | 0.000  |
| 20 | -3507.2196784 | 10.261                    | 4.0716 | <a href="#">/home/vw900/Amber/EGFR/AG-1478/Br-Feng/All-ACN/min-21.log</a> | 1            | 0.000  |
| 21 | -3507.2193719 | 10.453                    | 5.2741 | <a href="#">/home/vw900/Amber/EGFR/AG-1478/Br-Feng/All-ACN/min-19.log</a> | 1            | 0.000  |
| 22 | -3507.2193302 | 10.479                    | 4.0168 | <a href="#">/home/vw900/Amber/EGFR/AG-1478/Br-Feng/All-ACN/min-22.log</a> | 1            | 0.000  |

Table S2.6 The 22 clustered lowest lying PD153035 conformers calculated using DFT B3LYP/6-311++G(d,p) in DMSO solvent.

Sorted clusters

| #  | Energy        | RelativeEnergy (kcal/mol) | Dipole | File Name                                                                  | Cluster Size | %      |
|----|---------------|---------------------------|--------|----------------------------------------------------------------------------|--------------|--------|
| 1  | -3507.2362515 | 0.000                     | 8.0794 | <a href="#">/home/vw900/Amber/EGFR/AG-1478/Br-Feng/All-DMSO/min-01.log</a> | 1            | 64.518 |
| 2  | -3507.2356513 | 0.377                     | 4.2142 | <a href="#">/home/vw900/Amber/EGFR/AG-1478/Br-Feng/All-DMSO/min-02.log</a> | 1            | 33.788 |
| 3  | -3507.2321299 | 2.586                     | 7.3965 | <a href="#">/home/vw900/Amber/EGFR/AG-1478/Br-Feng/All-DMSO/min-03.log</a> | 1            | 0.760  |
| 4  | -3507.2315354 | 2.959                     | 4.6320 | <a href="#">/home/vw900/Amber/EGFR/AG-1478/Br-Feng/All-DMSO/min-05.log</a> | 1            | 0.400  |
| 5  | -3507.2306686 | 3.503                     | 4.6055 | <a href="#">/home/vw900/Amber/EGFR/AG-1478/Br-Feng/All-DMSO/min-04.log</a> | 1            | 0.157  |
| 6  | -3507.2306306 | 3.527                     | 3.7032 | <a href="#">/home/vw900/Amber/EGFR/AG-1478/Br-Feng/All-DMSO/min-08.log</a> | 1            | 0.151  |
| 7  | -3507.2305760 | 3.561                     | 9.9971 | <a href="#">/home/vw900/Amber/EGFR/AG-1478/Br-Feng/All-DMSO/min-06.log</a> | 1            | 0.142  |
| 8  | -3507.2300072 | 3.918                     | 5.8769 | <a href="#">/home/vw900/Amber/EGFR/AG-1478/Br-Feng/All-DMSO/min-07.log</a> | 1            | 0.077  |
| 9  | -3507.2262236 | 6.293                     | 4.1723 | <a href="#">/home/vw900/Amber/EGFR/AG-1478/Br-Feng/All-DMSO/min-10.log</a> | 1            | 0.001  |
| 10 | -3507.2261972 | 6.309                     | 3.6831 | <a href="#">/home/vw900/Amber/EGFR/AG-1478/Br-Feng/All-DMSO/min-14.log</a> | 1            | 0.001  |
| 11 | -3507.2260362 | 6.410                     | 2.9584 | <a href="#">/home/vw900/Amber/EGFR/AG-1478/Br-Feng/All-DMSO/min-09.log</a> | 1            | 0.001  |
| 12 | -3507.2259709 | 6.451                     | 8.2549 | <a href="#">/home/vw900/Amber/EGFR/AG-1478/Br-Feng/All-DMSO/min-13.log</a> | 1            | 0.001  |
| 13 | -3507.2259587 | 6.459                     | 4.7586 | <a href="#">/home/vw900/Amber/EGFR/AG-1478/Br-Feng/All-DMSO/min-15.log</a> | 1            | 0.001  |
| 14 | -3507.2253529 | 6.839                     | 4.3013 | <a href="#">/home/vw900/Amber/EGFR/AG-1478/Br-Feng/All-DMSO/min-16.log</a> | 1            | 0.001  |
| 15 | -3507.2248330 | 7.165                     | 7.0719 | <a href="#">/home/vw900/Amber/EGFR/AG-1478/Br-Feng/All-DMSO/min-12.log</a> | 1            | 0.000  |
| 16 | -3507.2247513 | 7.216                     | 5.8805 | <a href="#">/home/vw900/Amber/EGFR/AG-1478/Br-Feng/All-DMSO/min-17.log</a> | 1            | 0.000  |
| 17 | -3507.2246326 | 7.291                     | 7.7101 | <a href="#">/home/vw900/Amber/EGFR/AG-1478/Br-Feng/All-DMSO/min-11.log</a> | 1            | 0.000  |
| 18 | -3507.2245908 | 7.317                     | 5.0978 | <a href="#">/home/vw900/Amber/EGFR/AG-1478/Br-Feng/All-DMSO/min-18.log</a> | 1            | 0.000  |
| 19 | -3507.2198703 | 10.279                    | 5.2853 | <a href="#">/home/vw900/Amber/EGFR/AG-1478/Br-Feng/All-DMSO/min-20.log</a> | 1            | 0.000  |
| 20 | -3507.2198201 | 10.311                    | 4.0854 | <a href="#">/home/vw900/Amber/EGFR/AG-1478/Br-Feng/All-DMSO/min-21.log</a> | 1            | 0.000  |
| 21 | -3507.2195098 | 10.505                    | 5.2974 | <a href="#">/home/vw900/Amber/EGFR/AG-1478/Br-Feng/All-DMSO/min-19.log</a> | 1            | 0.000  |
| 22 | -3507.2194719 | 10.529                    | 4.0353 | <a href="#">/home/vw900/Amber/EGFR/AG-1478/Br-Feng/All-DMSO/min-22.log</a> | 1            | 0.000  |

Table S3 Comparison of the top AG-1478 and PD15035 conformers in DMSO.

| Cluster<br>(conformer) | AG - 1478*             |                |                              |               | PD153035               |                |                               |               |
|------------------------|------------------------|----------------|------------------------------|---------------|------------------------|----------------|-------------------------------|---------------|
|                        | $\Delta E$<br>Kcal/mol | $\mu$<br>Debye | Cluster<br>Size <sup>#</sup> | Weight<br>(%) | $\Delta E$<br>Kcal/mol | $\mu$<br>Debye | Cluster<br>Size <sup>\$</sup> | Weight<br>(%) |
| 1                      | 0.000                  | 8.450          | 10                           | 67.646        | 0.000                  | 8.079          | 2                             | 64.518        |
| 2                      | 0.594                  | 3.648          | 11                           | 26.819        | 0.377                  | 4.214          | 5                             | 33.788        |
| 3                      | 1.975                  | 8.178          | 17                           | 3.871         | 2.586                  | 7.397          | 9                             | 0.760         |
| 4                      | 2.570                  | 5.305          | 11                           | 0.900         | 2.595                  | 4.632          | 9                             | 0.400         |
| 5                      | 2.933                  | 11.100         | 9                            | 0.395         | 3.053                  | 4.605          | 3                             | 0.157         |
| 6                      | 3.516                  | 5.812          | 19                           | 0.306         | 3.527                  | 3.703          | 9                             | 0.151         |
| 7                      | 4.567                  | 3.310          | 12                           | 0.032         | 3.561                  | 9.997          | 6                             | 0.142         |
| 8                      | 4.631                  | 4.673          | 10                           | 0.024         | 3.918                  | 5.877          | 2                             | 0.077         |
| 9                      | 5.373                  | 9.245          | 5                            | 0.003         | 6.293                  | 4.172          | 2                             | 0.001         |
| 10                     | 5.970                  | 4.383          | 5                            | 0.001         | 6.309                  | 3.683          | 1                             | 0.001         |
| 11                     | 6.884                  | 4.149          | 6                            | 0.000         | 6.410                  | 2.958          | 9                             | 0.001         |
| 12                     | 6.898                  | 4.407          | 14                           | 0.001         | 6.451                  | 8.255          | 8                             | 0.001         |

\* Wang and Vasilyev, Int. J. Quan. Chem. (2021, 10.1002/qua.26765).

<sup>#</sup>The total number of AG-1478 (Cl) conformers in the lowest 12 clusters is 129.

<sup>\$</sup>The total number of PD153035 (Br) conformers in the lowest 12 clusters is 65.
